# Supplementary material for: Modified Unilateral Approach for Ventrally Located Spinal Tumors
Source: PubMed Central journal article supplement — Neurol Med Chir (Tokyo). 2023 Jul 25;63(10):443–9. doi: 10.2176/jns-nmc.2022-0330 (PMC10687673; doi:10.2176/jns-nmc.2022-0330), 2023-07-25
Supplement: 1349-8029-63-0443-s001.pdf [file 1349-8029-63-0443-s001.pdf]

**Modified MacCormick Scale.**

|     |                                                                         |
|-----|-------------------------------------------------------------------------|
| I   | Intact neurologically, normal ambulation, minimal dysesthesia.          |
| II  | Mild motor or sensory deficit, functional independence.                 |
| III | Moderately deficit, limitation of function, independent w/external aid. |
| IV  | Severe motor or sensory deficit, limited function, dependent.           |
| V   | Paraplegia or quadriplegia, even w/flickering movement.                 |
