# Supplementary figures and images for: Modified Unilateral Approach for Ventrally Located Spinal Tumors
Source: PubMed Central journal article supplement — Neurol Med Chir (Tokyo). 2023 Jul 25;63(10):443–9. doi: 10.2176/jns-nmc.2022-0330 (PMC10687673; doi:10.2176/jns-nmc.2022-0330), 2023-07-25

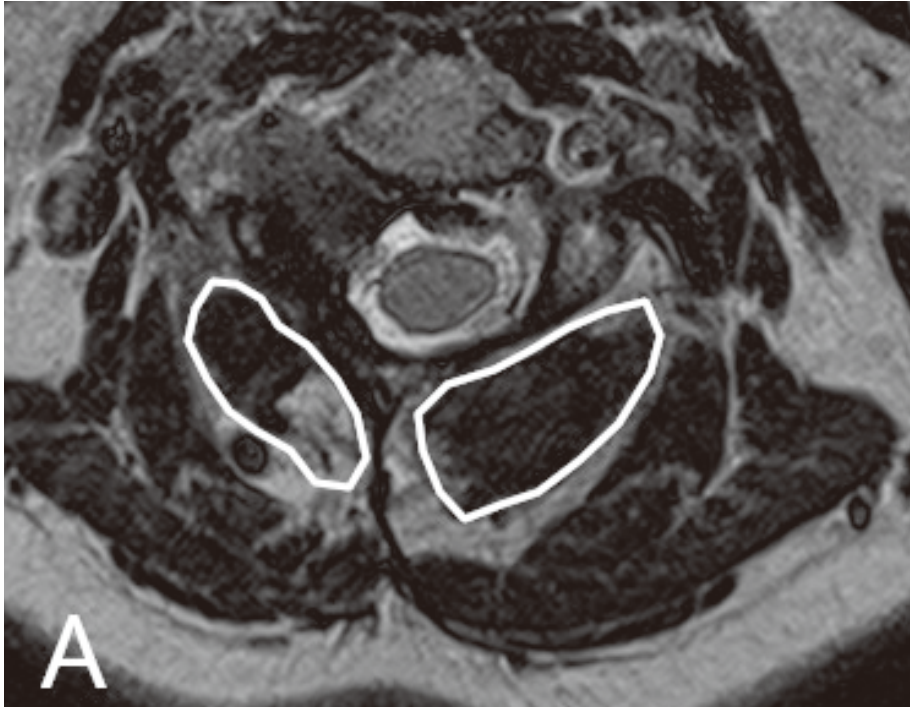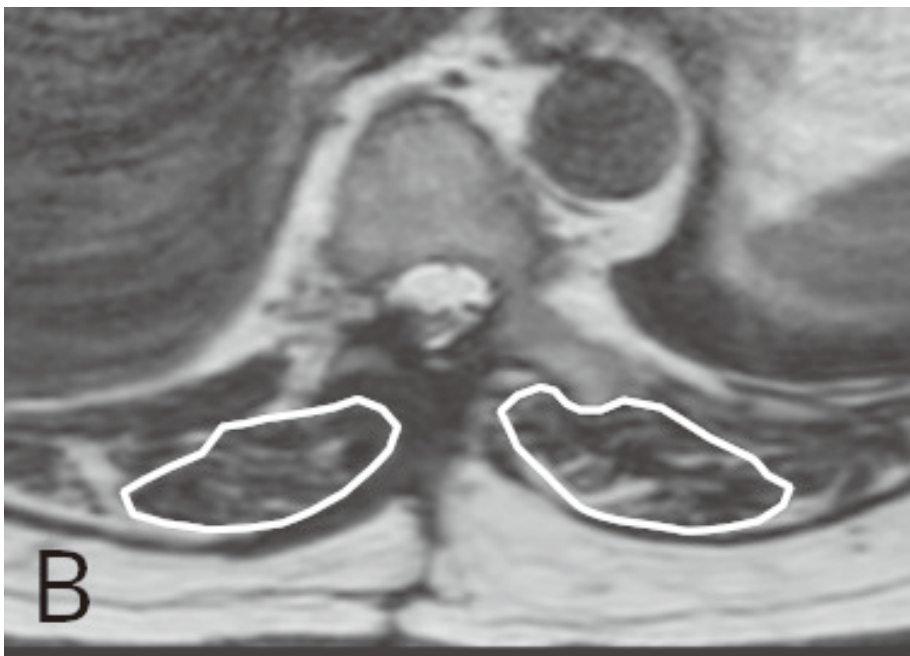

Supplement: 1349-8029-63-0443-s002.pdf [file 1349-8029-63-0443-s002.pdf]

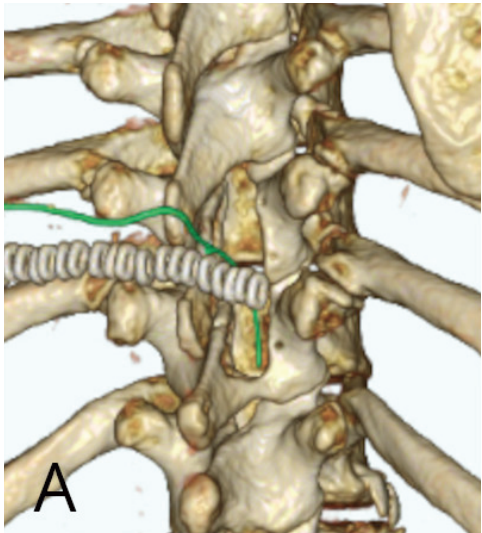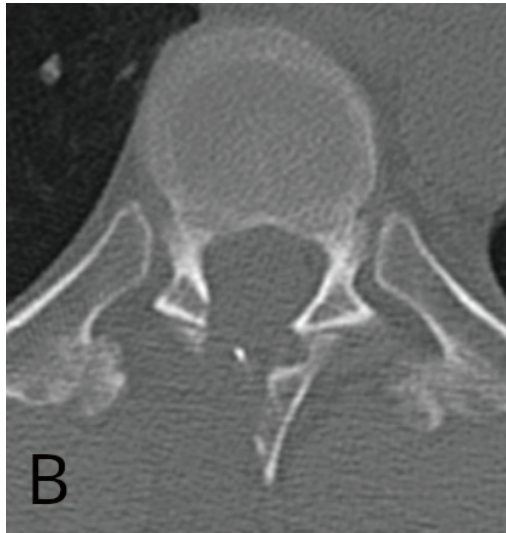

Supplement: 1349-8029-63-0443-s003.pdf [file 1349-8029-63-0443-s003.pdf]
